# Supplementary material for: A Comprehensive Evaluation of the Activity and Selectivity Profile of Ligands for RGD-binding Integrins
Source: PubMed Central journal article supplement (PMC5225454; doi:10.1038/srep39805), 2017-01-11
Supplement: srep39805-s1.pdf [file srep39805-s1.pdf]

# **Supporting Information**

## **A Comprehensive Evaluation of the Activity and Selectivity Profile of Ligands for RGD-binding Integrins**

Tobias G. Kapp, Florian Rechenmacher, Stefanie Neubauer, Oleg V. Maltsev, Ada E. Cavalcanti-Adam, Revital Zarka, Ute Reuning, Johannes Notni, Hans-Jürgen Wester, Carlos Mas-Moruno, Joachim Spatz, Benjamin Geiger & Horst Kessler

*\*E-mail: kessler@tum.de*

# 1. General information

**Chemicals:** All reagents and solvents were obtained from commercial suppliers and used without further purification.

**Chromatography:** Analytical HPLC-ESI-MS was performed on a Hewlett-Packard Series HP 1100 equipped with a Finnigan LCQ mass spectrometer using a YMC-Hydrosphere C18 column (12 nm pore size, 3  $\mu\text{m}$  particle size, 125 mm $\times$ 2.1 mm) or YMC-Octyl C8 column (20 nm pore size, 5  $\mu\text{m}$  particle size, 250 mm $\times$ 2.1 mm) and H<sub>2</sub>O (0.1% v/v formic acid) / MeCN (0.1% v/v formic acid) as eluents. Semi-preparative HPLC was performed using a Beckmann instrument (system gold, solvent delivery module 126, UV detector 166), an YMC ODS-A column (20 $\times$ 250 mm, 5  $\mu\text{m}$ ), flow rate: 8 mL/min, linear gradients of H<sub>2</sub>O (0.1% v/v TFA) and MeCN (0.1% v/v TFA).

# 2. Synthesis

## General synthetic procedures

### GP1 Loading of CTC-resin

Peptide synthesis was carried out using CTC-resin (1.6 mmol/g) following standard Fmoc-strategy. Fmoc-Xaa-OH (1.2 eq.) were attached to the CTC-resin with *N,N*-diisopropylethylamine (DIPEA; 2.5 eq.) in anhydrous DCM (8 mL/g resin) at room temperature for 1 h. The remaining reactive trityl chloride groups were capped by addition of 1 mL/g(resin) of a solution of MeOH, DIEA (5:1; v:v) to the solution and after incubation for 15 min. The resin was filtered and washed 5 times with DCM and 3 times with MeOH. The loading capacity was determined by weight after drying the resin under vacuum and ranged from 0.8-1.4 mmol/g.

### GP2 On-Resin Fmoc Deprotection

The resin-bound Fmoc peptide was treated with 20% piperidine in NMP (v/v) for 10 minutes and a second time for 5 min. The resin was washed 5 times with NMP.

### GP3 Standard Amino Acid Coupling

A solution of Fmoc-Xaa-OH (2 eq.), 2-(1*H*-Benzotriazole-1-yl)-1,1,3,3-tetramethyluronium tetrafluoroborate (TBTU) (2 eq.), Hydroxybenzotriazole (HOBT; 2 eq.), and DIPEA (5.2 eq.) in NMP (1 mL/g resin) was added to the resin-bound free amine peptide and shaken for 60 min at room temperature and washed 5 times with NMP.

#### **GP4 On-Resin *N*-Methylation**

The linear, Fmoc-protected peptide is washed with DCM (3x) incubated with a solution of 2-nitrobenzenesulfonylchloride (*o*-NBS-Cl, 4 eq.) and 2,4,6-collidine (10 eq.) in DCM for 20 min at r.t.. The resin is washed with DCM (3x) and THF *abs.* (5x). A solution containing PPh<sub>3</sub> (5 eq.) and MeOH *abs.* (10 eq.) in THF *abs.* is added to the resin. DIAD (5 eq.) in a small amount THF *abs.* is added stepwise to the resin and the solution is incubated for 15 min and washed with THF (5x) and NMP (5x). For *o*-Ns deprotection, the resin-bound *o*-Ns-peptides were stirred in a solution of mercaptoethanol (10 eq.) and DBU (5 eq.) in NMP (1 mL/g resin) for 5 min. The deprotection procedure was repeated one more time and the resin was washed 5 times with NMP.

#### **GP5 Cleavage of linear peptides from the resin**

For complete cleavage from the resin the peptides were treated three times with a solution of DCM and hexafluoroisopropanol (HFIP; 4:1; v:v) at room temperature for half an hour and the solvent evaporated under reduced pressure.

#### **GP6 Backbone cyclization with DPPA**

To a solution of peptide in DMF (1 mM peptide concentration) and NaHCO<sub>3</sub> (5 eq.) diphenylphosphoryl azide (DPPA; 3 eq.) was added at room temperature (RT) and stirred overnight or until no linear peptide could be observed by ESI-MS. The solvent was evaporated to a small volume under reduced pressure and the peptides precipitated in saturated NaCl solution and washed two times in HPLC grade water.

#### **GP7 Removal of Acid Labile Side Chain Protecting Groups**

Cyclized peptides were stirred in a solution of TFA, water and TIPS (triisopropyl silane) (95:2.5:2.5) at room temperature for one hour or until no more protected peptide could be observed by ESI-MS and precipitated in diethylether and washed two more times.

#### **GP8 Cyclization via disulfide-bridges**

The HPLC-purified peptide is dissolved in a mixture of DMSO and H<sub>2</sub>O (1/1, v/v) and vigorously stirred until no starting material could be detected in LC-MS. The solvent was removed under reduced pressure (co-evaporation with CHCl<sub>3</sub>), taken up in a mixture of ACN/H<sub>2</sub>O and lyophilized.

## Ligand synthesis analytical data

|                                  | synthesis | supplier/<br>donor          | order<br>number | t <sub>R</sub><br>(min)** | mass (m/z) |
|----------------------------------|-----------|-----------------------------|-----------------|---------------------------|------------|
| <i>Echistatin</i>                | no        | Sigma-<br>Aldrich           | E1518           | -                         | -          |
| <i>RGD</i>                       | no        | APexBio                     | B3708           | -                         | -          |
| <i>RGDS</i>                      | no        | GenScript                   | RP10861         | -                         | -          |
| <i>GRGDS</i>                     | no        | AnaSpec                     | AS-61107        | -                         | -          |
| <i>GRGDSP</i>                    | no        | AnaSpec                     | AS-22945        | -                         | -          |
| <i>GRGDSPK</i>                   | no        | AnaSpec                     | 61109           | -                         | -          |
| <i>GRGDNP</i>                    | no        | AnaSpec                     | 62049           | -                         | -          |
| <i>GRGDTP</i>                    | no        | AnaSpec                     | 22947           | -                         | -          |
| <i>c(RGDfV)</i>                  | yes       | -                           | -               | 5.8                       | 575.4      |
| <i>Cilengitide c(RGDf(NMe)V)</i> | yes       | -                           | -               | 6.6                       | 589.5      |
| <i>c(RGDfK)</i>                  | yes       | -                           | -               | 5.1                       | 603.4      |
| <i>c(RGDyK)</i>                  | no        | AnaSpec                     | 61183-1         | -                         | -          |
| <i>c(RGDfC)</i>                  | no        | AnaSpec                     | 63785-1         | -                         | -          |
| <i>sn243</i>                     | yes       | -                           | -               | -                         | 522.5      |
| <i>RGD-4C</i>                    | no        | Abbiotech                   | 350363          | -                         | -          |
| <i>RGD10 (RGD-2C)</i>            | yes       | -                           | -               | 4.3                       | 1476.7     |
| <i>NC100717</i>                  | no        | GE                          | donation        | -                         | -          |
| <i>c(phgisoDGRk)</i>             | yes       | -                           | -               | 4.4                       | 590.4      |
| <i>44b</i>                       | yes       | -                           | -               | 6.7                       | 513.5      |
| <i>ATN161</i>                    | no        | MedKoo                      | 200350a         | -                         | -          |
| <i>JSM6427</i>                   | no        | 3B Pharma-<br>ceuticals     | -               | -                         | -          |
| <i>RTDLDSLRT</i>                 | yes       | -                           | -               | 4.9                       | 1077.8     |
| <i>A20FMDV2</i>                  | no        | Dr. Curnis /<br>Prof. Corti | donation        | -                         | -          |
| <i>Mol11*</i>                    | yes       | -                           | -               | -                         | 525.5      |
| <i>c(FRGDLAFp(NMe)K(Ac)</i>      | yes       | -                           | -               | 6.3                       | 1088.5     |
| <i>Eptifibatide</i>              | no        | Tocris                      | 4725            | -                         | -          |

|                  |    |        |       |   |
|------------------|----|--------|-------|---|
| <b>Tirofiban</b> | no | Sigma  | 30165 |   |
| <b>GR144053</b>  | no | TOCRIS | 1263  | - |

\* (S-Enantiomer)

\*\* HPLC-MS (ESI), C18-column, gradient 10-90% ACN/H<sub>2</sub>O

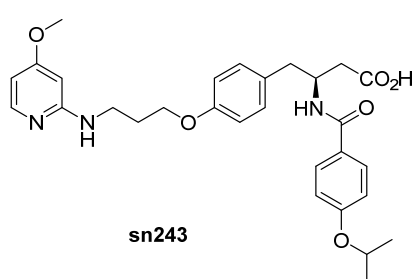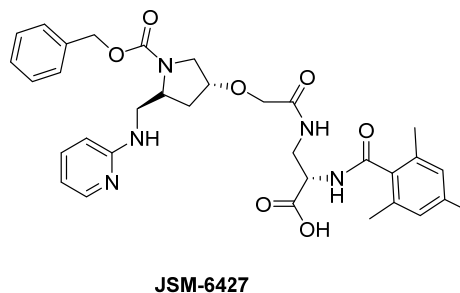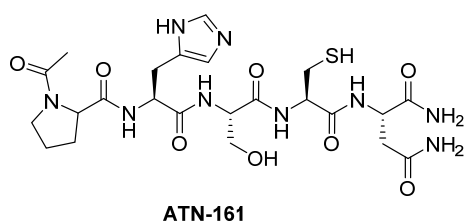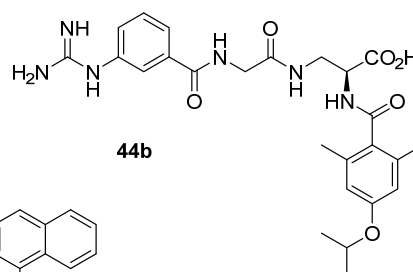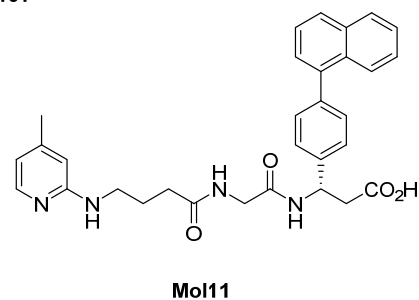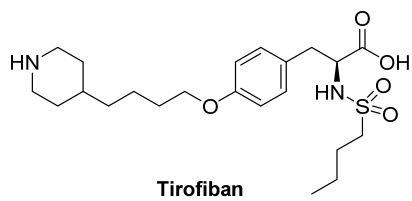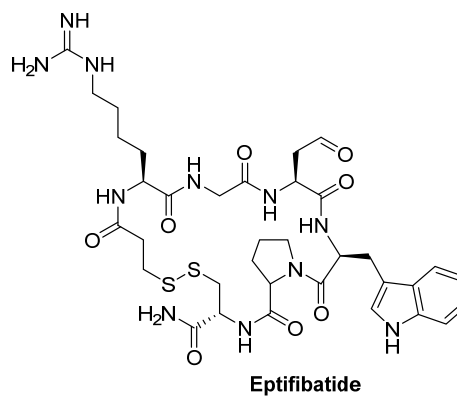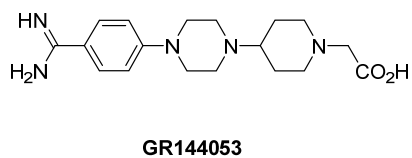

## Synthesis of *sn243* and *44b*

The synthesis was done as described in Rechenmacher et al. *Angew. Chem. Int. Ed.* **2013**, *52*, 1572-1575.

## Synthesis of Mol11

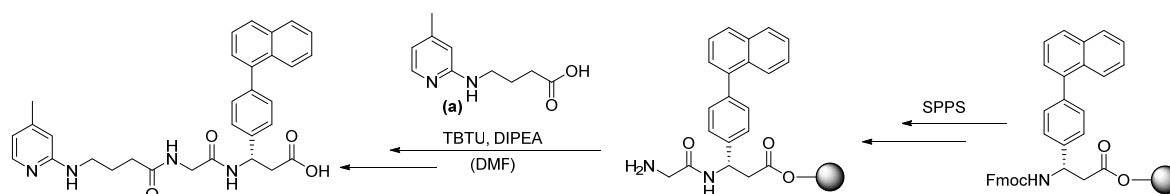

The enantiomerically pure compound (*S*)-3-(Fmoc-amino)-3-(4-(naphthalen-1-yl)phenyl)propionic acid (IRIS Biotech) was loaded to the CTC resin analog to **GP1**. After Fmoc-deprotection (**GP2**), Fmoc-Gly-OH was coupled on resin (**GP3**). In the next step, the building block (**a**) was coupled followed by a cleavage from the resin. After evaporation of the solvent, Mol11 was purified by semipreparative HPLC.

## Synthesis of (a)

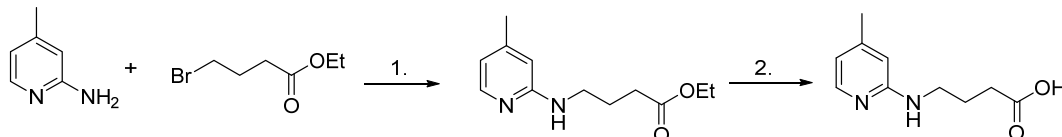

2-amino-4-picoline (11.9 g, 110 mmol, 1.0 eq) is mixed with Na<sub>2</sub>CO<sub>3</sub> (11.7 g, 110 mmol, 1.0 eq) and 4-bromo ethyl butyrate is slowly added under stirring. The mixture is stirred for 5 h at 120°C and subsequently taken up in 200 ml H<sub>2</sub>O. Afterwards, 1M HCl is used to adjust the pH = 8. After extraction with 100 ml EtOAc (2x), the organic layer is dried using Na<sub>2</sub>SO<sub>4</sub> and the solvent removed under vacuo. Flash chromatography (CHCl<sub>3</sub>/MeOH: 95/5 (v/v), R<sub>f</sub> = 0.4) yields methyl-4-((4-methylpyridin-2-yl)butanoate (3.6 g) as a brown solid.

This compound (3.6 g) was dissolved in 50 ml dioxan and 20 ml of a 2M aqueous NaOH-solution was added and stirred over night. Dioxan is removed under vacuo, 100 ml H<sub>2</sub>O added and the extraction with EtOAc done. The title compound is dissolved in the water phase, which is lyophilized over night. Flash chromatography (CHCl<sub>3</sub>/MeOH/AcOH: 85/10 /5 (v/v/v), R<sub>f</sub> = 0.28) yields (**a**) (2.8 g 14.4 mmol, 13%) brownish solid.

**<sup>1</sup>H-NMR**: (300 MHz, DMSO-*d*<sub>6</sub>, 300 K) δ = 7.75 (d, *J* = 5.5 Hz, 1H), 6.44 (s, 1H), 6.35 (dd, *J* = 5.6 Hz, *J* = 1.4 Hz, 1H), 3.21 (dt, *J* = 6.4 Hz, *J* = 6.6 Hz, 2H), 2.80 (t, *J* = 7.5 Hz, 2H), 2.13 (s, 3H), 1.70 (quin, *J* = 7.2 Hz, 2H). **MS (ESI)**: *m/z*: 194.1 [m+H]<sup>+</sup>. **HPLC** (10-90 % 7 min) t<sub>R</sub> = 1.22 min.

## Functionalized compounds

|                                 | synthesis | supplier /donor          | order number | t <sub>R</sub> (min) | mass (m/z) |
|---------------------------------|-----------|--------------------------|--------------|----------------------|------------|
| <b>F-Galacto-c(RGDfK)</b>       | no        | ABX                      | 9800         |                      |            |
| <b>(Ga)NOPO-c(RGDfK)</b>        | no        | Dr. Notni / Prof. Wester | donation     | -                    | -          |
| <b>c(RGDfK)-Hegas-MPA</b>       | yes       |                          |              | 8.7                  | 1027.7     |
| <b>c(phg-isoDGR-k)-O2Oc-MPA</b> | yes       | -                        | -            | 4.2                  | 823.5      |
| <b>Flucilatide</b>              | no        | GE                       | donation     | -                    | -          |

\*\* HPLC-MS (ESI), C18-column, gradient 10-90% ACN/H<sub>2</sub>O, 15 min

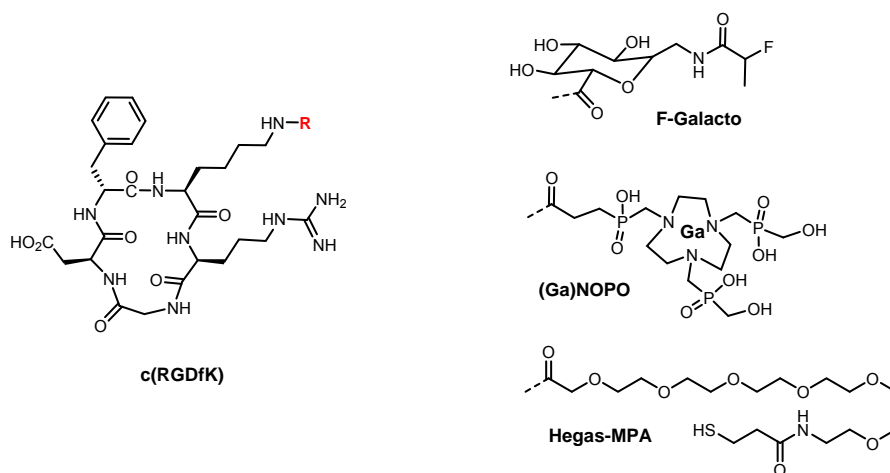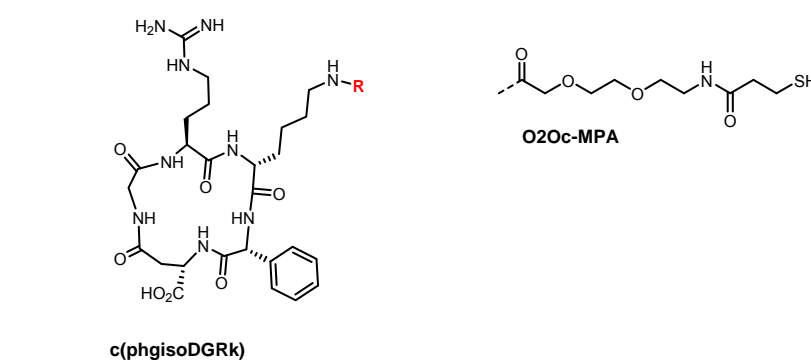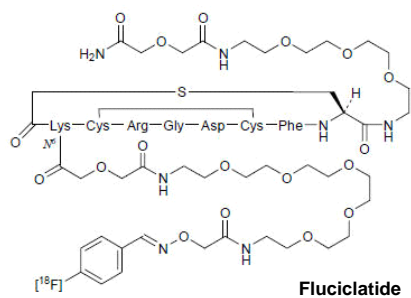

### Synthesis of **c(RGDfK)-Hegas-MPA**

The orthogonally protected cyclic peptide *cyclo*(Arg(Pbf)-Gly-Asp(*t*Bu)-D-Phe-Lys(Cbz)) was synthesized following the general procedures outlined above. This compound was orthogonally Cbz-deprotected by dissolving the compound in MeOH, adding catalytic amounts (20 mol%) of Pd/C and stirring over night in an H<sub>2</sub>-atmosphere (1 atm.). The catalyst is filtered off and the solvent removed under reduced pressure and the remaining compound (**c(R(Pbf)GD(*t*Bu)fK)**) taken up in a mixture of ACN/H<sub>2</sub>O and lyophilized over night.

In parallel, Fmoc-21-amino-4,7,10,13,16,19-hexaoxaheneicosanoic acid is loaded to the resin according to **GP1** and subsequently coupled after Fmoc-deprotection (**GP2**) on resin to 3-mercapto (trityl) propionic acid (**GP3**). After cleavage from the resin (**GP5**), the compound **Hegas-MPA** is lyophilized from a ACN/H<sub>2</sub>O-mixture).

1.2 eq. of **Hegas-MPA**, 1.2 eq. HATU and 3.0 eq. DIPEA are dissolved in a minimal amount of DMF (app. 30 mM) and stirred for 10 min at RT. Afterwards, a solution of **c(R(Pbf)GD(*t*Bu)fK)** is added dropwise to this solution and stirred for 1 h at RT. After removing the solvent *in vacuo*, the peptide conjugate gets directly deprotected by treating the crude product with a mixture of TFA/DCM/H<sub>2</sub>O (80/15/5, v/v/v) for 20 min. The title compound is obtained after semipreparative HPLC-purification.

### Synthesis of **c(phg-isoDGR-k)-O2Oc-MPA**

The orthogonally protected cyclic peptide *cyclo*(D-Phg-isoAsp(*t*Bu)-Gly-Arg(Pbf)-D-Lys(Cbz)) was synthesized following the general procedures outlined above. This compound was orthogonally Cbz-deprotected by dissolving the compound in MeOH, adding catalytic amounts (20 mol%) of Pd/C and stirring over night in an H<sub>2</sub>-atmosphere (1 atm.). The catalyst is filtered off and the solvent removed under reduced pressure and the remaining compound (**c(phg-isoDGR(Pbf)k)**) taken up in a mixture of ACN/H<sub>2</sub>O and lyophilized over night.

In parallel, 8-Fmoc-3,6-dioxaoctanoic acid is loaded to the resin according to **GP1** and subsequently coupled after Fmoc-deprotection (**GP2**) on resin to 3-mercapto (trityl) propionic acid (**GP3**). After cleavage from the resin (**GP5**), the compound **O2Oc-MPA** is lyophilized from a ACN/H<sub>2</sub>O-mixture).

1.2 eq. of **O2Oc-MPA**, 1.2 eq. HATU and 3.0 eq. DIPEA are dissolved in a minimal amount of DMF (app. 30 mM) and stirred for 10 min at RT. Afterwards, a solution of **c(phg-isoDGR(Pbf)k)** is added dropwise to this solution and stirred for 1 h at RT. After removing the solvent *in vacuo*, the peptide conjugate gets directly deprotected by treating the crude product with a mixture of TFA/DCM/H<sub>2</sub>O (80/15/5, v/v/v) for 20 min. The title compound is obtained after semipreparative HPLC-purification.



## Integrin Binding Assay

The activity and selectivity of integrin ligands were determined by a solid-phase binding assay according to the previously reported protocol [4] using coated extracellular matrix proteins and soluble integrins. The following compounds were used as internal standards: Cilengitide,  $\alpha$ -RGDf(MMe)V- ( $\alpha\beta3$  – 0.54 nM,  $\alpha\beta5$  – 8 nM,  $\alpha5\beta1$  – 15.4 nM), linear peptide RTDLDSLRT<sup>[4]</sup> ( $\alpha\beta6$  – 33 nM;  $\alpha\beta8$  – 100 nM) and tirofiban<sup>[5]</sup> ( $\alpha11\beta3$  – 1.2 nM).

Flat-bottom 96-well ELISA plates (BRAND, Wertheim, Germany) were coated overnight at 4 °C with the **ECM-protein (1)** (100  $\mu$ L per well) in carbonate buffer (15 mM Na<sub>2</sub>CO<sub>3</sub>, 35 mM NaHCO<sub>3</sub>, pH 9.6). Each well was then washed with PBS-T-buffer (phosphate-buffered saline/Tween20, 137 mM NaCl, 2.7 mM KCl, 10 mM Na<sub>2</sub>HPO<sub>4</sub>, 2 mM KH<sub>2</sub>PO<sub>4</sub>, 0.01% Tween20, pH 7.4; 3  $\times$  200  $\mu$ L) and blocked for 1 h at room temperature with TS-B-buffer (Tris-saline/BSA buffer; 150  $\mu$ L/well; 20 mM Tris-HCl, 150 mM NaCl, 1 mM CaCl<sub>2</sub>, 1 mM MgCl<sub>2</sub>, 1 mM MnCl<sub>2</sub>, pH 7.5, 1% BSA). In the meantime, a dilution series of the compound and internal standard is prepared in an extra plate, starting from 20  $\mu$ M to 6.4 nM in 1:5 dilution steps. After washing the assay plate three times with PBS-T (200  $\mu$ L), 50  $\mu$ L of the dilution series were transferred to each well from B – G. Well A was filled with 100  $\mu$ L TSB-solution (blank) and well H was filled with 50  $\mu$ L TS-B-buffer. 50  $\mu$ L of a solution of **human integrin (2)** in TS-B-buffer was transferred to wells H – B and incubated for 1 h at rt. The plate was washed three times with PBS-T buffer, and then **primary antibody (3)** (100  $\mu$ L per well) was added to the plate. After incubation for 1 h at rt, the plate was washed three times with PBS-T. Then, **secondary peroxidase-labeled antibody (4)** (100  $\mu$ L/well) was added to the plate and incubated for 1 h at rt. After washing the plate three times with PBS-T, the plate was developed by quick addition of SeramunBlau (50  $\mu$ L per well, Seramun Diagnostic GmbH, Heidesee, Germany) and incubated for 5 min at rt in the dark. The reaction was stopped with 3 M H<sub>2</sub>SO<sub>4</sub> (50  $\mu$ L/well), and the absorbance was measured at 450 nm with a plate reader (POLARstar Galaxy, BMG Labtechnologies). The IC<sub>50</sub> of each compound was tested in duplicate, and the resulting inhibition curves were analyzed using OriginPro 7.5G software. The inflection point describes the IC<sub>50</sub> value. All determined IC<sub>50</sub> were referenced to the activity of the internal standard.

### $\alpha\beta3$

- (1) 1.0  $\mu$ g/mL human vitronectin; Millipore
- (2) 2.0  $\mu$ g/mL, human  $\alpha\beta3$ -integrin, R&D
- (3) 2.0  $\mu$ g/mL, mouse anti-human CD51/61, BD Biosciences
- (4) 1.0  $\mu$ g/mL, anti-mouse IgG-POD, Sigma-Aldrich

### $\alpha 5\beta 1$

- (1) 0.5  $\mu\text{g}/\text{mL}$ ; human fibronectin, Sigma-Aldrich
- (2) 2.0  $\mu\text{g}/\text{mL}$ , human  $\alpha 5\beta 1$ -integrin, R&D
- (3) 1.0  $\mu\text{g}/\text{mL}$ , mouse anti-human CD49e, BD Biosciences
- (4) 2.0  $\mu\text{g}/\text{mL}$ , anti-mouse IgG-POD, Sigma-Aldrich

### $\alpha \nu \beta 5$

- (1) 5.0  $\mu\text{g}/\text{mL}$ ; human vitronectin, Millipore
- (2) 3.0  $\mu\text{g}/\text{mL}$ , human  $\alpha \nu \beta 5$ -integrin, Millipore
- (3) 1:500 dilution, anti- $\alpha \nu$  mouse anti-human MAB1978, Millipore
- (4) 1.0  $\mu\text{g}/\text{mL}$ , anti-mouse IgG-POD, Sigma-Aldrich

### $\alpha \nu \beta 6$

- (1) 0.4  $\mu\text{g}/\text{mL}$ ; LAP (TGF- $\beta$ ), R&D
- (2) 0.5  $\mu\text{g}/\text{mL}$ , human  $\alpha \nu \beta 6$ -Integrin, R&D
- (3) 1:500 dilution, anti- $\alpha \nu$  mouse anti-human MAB1978, Millipore
- (4) 2.0  $\mu\text{g}/\text{mL}$ , anti-mouse IgG-POD, Sigma-Aldrich

### $\alpha \nu \beta 8$

- (1) 0.4  $\mu\text{g}/\text{mL}$ ; LAP (TGF-b), R&D
- (2) 0.5  $\mu\text{g}/\text{mL}$ , human  $\alpha \nu \beta 8$ -Integrin, R&D
- (3) 1:500 dilution, anti- $\alpha \nu$  mouse antihuman MAB1978, Millipore
- (4) 2.0  $\mu\text{g}/\text{mL}$ , anti-mouse IgG-POD, Sigma-Aldrich

### $\alpha \text{IIb}\beta 3$

- (1) 10.0  $\mu\text{g}/\text{mL}$ ; human fibrinogen, Sigma-Aldrich
- (2) 5.0  $\mu\text{g}/\text{mL}$ , human platelet integrin  $\alpha \text{IIb}\beta 3$ , VWR
- (3) 2.0  $\mu\text{g}/\text{mL}$ , mouse anti-human CD41b, BD Biosciences
- (4) 1.0  $\mu\text{g}/\text{mL}$ , anti-mouse IgG-POD, Sigma-Aldrich

---

[i] A.O. Frank, E. Otto, C.Mas-Moruno, H.B. Schiller, L. Marinelli, S. Cosconati, A. Bochen, D. Vossmeier,, G. Zahn, R. Stragies, E. Novellino, H. Kessler. *Angew. Chem. Int. Ed.* **2010**, *49*, 9278–9281.
